# Supplementary material for: Golgi Protein 73 (GP73) Serum Levels Predict Outcome after Resection of Biliary Tract Cancer
Source: MDPI journal article supplement (doi:10.3390/cancers14184428), 2022-09-12
Supplement: s1 [file s1]

**Supplementary Table S1.** Various laboratory parameter of study cohort (median, range).

| Laboratory parameter       | BTC patients (n=97)  | Healthy controls (n=31) |
|----------------------------|----------------------|-------------------------|
| GP73 pre-OP [ng/ml]        | 51.08 [6.45-156.94]  | 26.97 [16.26-64.80]     |
| GP73 post-OP [ng/ml]       | 71.87 [41.65-188.94] | -                       |
| CEA [µg/l]                 | 3.0 [0.71-333.0]     | 1.30 [0.30-4.30]        |
| CA 19-9 [U/ml]             | 79.4 [0.6-22911.0]   | 5.70 [0.0-44.10]        |
| Leukocyte count [cells/nl] | 7.85 [2.9-21.6]      |                         |
| CRP [mg/l]                 | 18.0 [0.0-230.0]     |                         |
| Platelets [cells/nl]       | 266.5 [65.0-931.0]   |                         |
| Hemoglobin [g/l]           | 12.45 [7.8-17.1]     |                         |
| Sodium [mmol/l]            | 140.0 [131.0-146.0]  |                         |
| Potassium [mmol/l]         | 4.4 [2.9-6.1]        |                         |
| AST [U/l]                  | 45.5 [18.0-1587.0]   | 28.0 [20.0-78.0]        |
| Bilirubin [mg/dl]          | 1.0 [0.24-21.49]     | 0.42 [0.1-0.92]         |
| ALP [U/l]                  | 219.5 [53.0-1055.0]  | 68.0 [40.0-98.0]        |
| GGT [U/l]                  | 311.0 [36.0-1794.0]  | 18.0 [8.0-98.0]         |
| Creatinine [mg/dl]         | 0.9 [0.43-2.08]      |                         |

BTC: biliary tract cancer, GP73: golgi protein 73, CEA: carcinoembryonic antigen, CA 19-9: carbohydrate-Antigen 19-9, CRP: C-reactive protein, AST: aspartate transaminase, ALP: alkaline phosphatase, GGT: gamma-glutamyltransferase

**Supplementary Table S2.** Correlation analysis between baseline GP73 and tumor markers as well as markers of organ dysfunction.

| Parameter       | GP73   |         |
|-----------------|--------|---------|
|                 | $r_s$  | p-value |
| CEA             | 0.299  | 0.004   |
| CA19-9          | 0.406  | <0.001  |
| Leukocyte count | 0.105  | 0.311   |
| CRP             | 0.393  | < 0.001 |
| Platelets       | -0.086 | 0.407   |
| Creatinine      | 0.122  | 0.235   |
| Sodium          | -0.169 | 0.055   |
| Potassium       | -0.041 | 0.688   |
| AST             | 0.091  | 0.378   |
| Bilirubin       | 0.142  | 0.169   |
| ALP             | 0.131  | 0.208   |
| GGT             | 0.047  | 0.655   |

GP73: golgi protein 73, CEA: carcinoembryonic antigen, CA 19-9: carbohydrate-Antigen 19-9, CRP: C-reactive protein, AST: aspartate transaminase, ALP: alkaline phosphatase, GGT: gamma-glutamyltransferase
